# Supplementary material
Source: Elsevier journal article supplement (https://www.sciencedirect.com/science/article/pii/S1130239917300019)
Supplement: mmc3 [file S1130239917300019:mmc3.pdf]

**Tabla 3. Diseño y contenidos principales de los estudios incluidos relacionados con el paciente crítico pediátrico**

| Primer autor, año de publicación | Diseño estudio y muestra                                          | Factor de riesgo identificado                                                                                                                                                                                                                                                                                                                                                                                                                                                                                                                                                                                                                           | Estrategia preventiva propuesta                                                                                                                                                                                                                                                                                                                                                                                                                                                                                                                                                             |
|----------------------------------|-------------------------------------------------------------------|---------------------------------------------------------------------------------------------------------------------------------------------------------------------------------------------------------------------------------------------------------------------------------------------------------------------------------------------------------------------------------------------------------------------------------------------------------------------------------------------------------------------------------------------------------------------------------------------------------------------------------------------------------|---------------------------------------------------------------------------------------------------------------------------------------------------------------------------------------------------------------------------------------------------------------------------------------------------------------------------------------------------------------------------------------------------------------------------------------------------------------------------------------------------------------------------------------------------------------------------------------------|
| Acorda DE, 2015                  | Observacional prospectivo                                         | <p>La no evaluación de la piel secundaria al miedo de las enfermeras a retirar la mascarilla por el riesgo de asincronía.</p> <p>Falta de comunicación entre el equipo.</p> <p>Existencia de un porcentaje elevado de diversas mascarillas, sin un criterio acordado de cual había de ser la mejor mascarilla y el mejor apósito a utilizar.</p> <p>Falta de documentación para poder registrar lo que observan.</p> <p>El uso de un apósito hidrocoloide “DuoDerm” (proporciona un ambiente húmedo y promueve el desbridamiento auto lítico) no redistribuye la presión ejercida por la interfaz en los pacientes pediátricos con modalidad BiPAP.</p> | <p>Modelo de intervención multidisciplinar Plan-Do-Study-Act (PDSA) para mejorar la calidad de los cuidados al paciente sometido a modalidad BIPAP.</p> <p>Utilizar nuevas mascarillas,” Sleep Weaver “(mascarilla de tela).</p> <p>Utilizar apósito de espuma “Mepilex” mediante una plantilla de diferentes tamaños para asegurar un buen ajuste (esta plantilla no tiene adhesivo por lo que no lesiona la piel al ser retirada).</p> <p>Evaluar la piel cada 4 horas, señalizarla mediante círculos y registrarlo.</p> <p>Mejorar la comunicación entre el equipo multidisciplinar.</p> |
| Schlüer AB, 2014                 | Descriptivo, transversal en 204 pacientes (edades de 1 a 18 años) | El puente nasal es la zona anatómica con mayor riesgo de UPP en pacientes con tratamiento de CPAP.                                                                                                                                                                                                                                                                                                                                                                                                                                                                                                                                                      | Utilización de las escalas Braden Q y Glamorgan para valorar el riesgo de UPP del paciente crítico pediátrico.                                                                                                                                                                                                                                                                                                                                                                                                                                                                              |
| Hogeling M, 2012                 | Casos clínicos en unidad de cuidados intensivos neonatales        | La presión ejercida por el arnés causa lesiones en la piel.                                                                                                                                                                                                                                                                                                                                                                                                                                                                                                                                                                                             | <p>Utilizar el tamaño adecuado de la máscara.</p> <p>Ajuste correcto de las cintas de sujeción del arnés mediante un velcro.</p>                                                                                                                                                                                                                                                                                                                                                                                                                                                            |
| Schindler CA, 2011               | Descriptivo transversal en 5346 niños                             | Estancias superiores a 4 días en pacientes portadores de BiPAP-CPAP, edad inferior a 2                                                                                                                                                                                                                                                                                                                                                                                                                                                                                                                                                                  | Utilización de la escala Braden Q en recién nacidos y niños críticos.                                                                                                                                                                                                                                                                                                                                                                                                                                                                                                                       |

|                    |                                                                                             |                                                                                                                                               |                                                                                                                                                                                                                                                                  |
|--------------------|---------------------------------------------------------------------------------------------|-----------------------------------------------------------------------------------------------------------------------------------------------|------------------------------------------------------------------------------------------------------------------------------------------------------------------------------------------------------------------------------------------------------------------|
|                    |                                                                                             | años.<br>Lugar más frecuente el puente nasal y la frente.                                                                                     |                                                                                                                                                                                                                                                                  |
| Kiss EA, 2014      | Revisión bibliográfica                                                                      |                                                                                                                                               | Establecer guías estandarizadas de cuidados de la piel es necesario para la prevención de las úlceras por presión                                                                                                                                                |
| Jull A, 2016       | Observacional prospectivo en 8274 niños de cualquier edad                                   | La no evaluación del estado de la piel de forma continuada.                                                                                   | Estandarizar la evaluación de la piel de los pacientes                                                                                                                                                                                                           |
| Peterson, J., 2015 | Observacional prospectivo                                                                   | Deficiente colocación de la interfase                                                                                                         | Utilizar la escala Braden Q para la correcta valoración de la piel<br>Utilizar apósitos Mepilex® para la correcta colocación de la interfase                                                                                                                     |
| Nist M, 2016       | Observacional prospectivo con un total de 9025 evaluaciones en pacientes de UCIs neonatales | Escasa formación del personal en relación a la evaluación y cuidados de la piel.<br>Falta de inspección para la posible detección de heridas. | Valorar de forma rutinaria la piel e identificar, documentar y reportar lesiones cutáneas en los neonatos hospitalizados.<br>Crear una base de datos de las lesiones de la piel para la determinación precisa de la verdadera incidencia de úlceras por presión. |
